# Supplementary material for: Quantitative Proteomic Analysis of A549 Cells Infected with Human Respiratory Syncytial Virus
Source: PubMed Central journal article supplement — Mol Cell Proteomics. 2010 Jul 20;9(11):2438–59. doi: 10.1074/mcp.M110.001859 (PMC2984239; doi:10.1074/mcp.m110.001859), 2010-07-20
Supplement: supp_M110.001859_mcp.M110.001859-10.pdf [file supp_M110.001859_mcp.M110.001859-10.pdf]

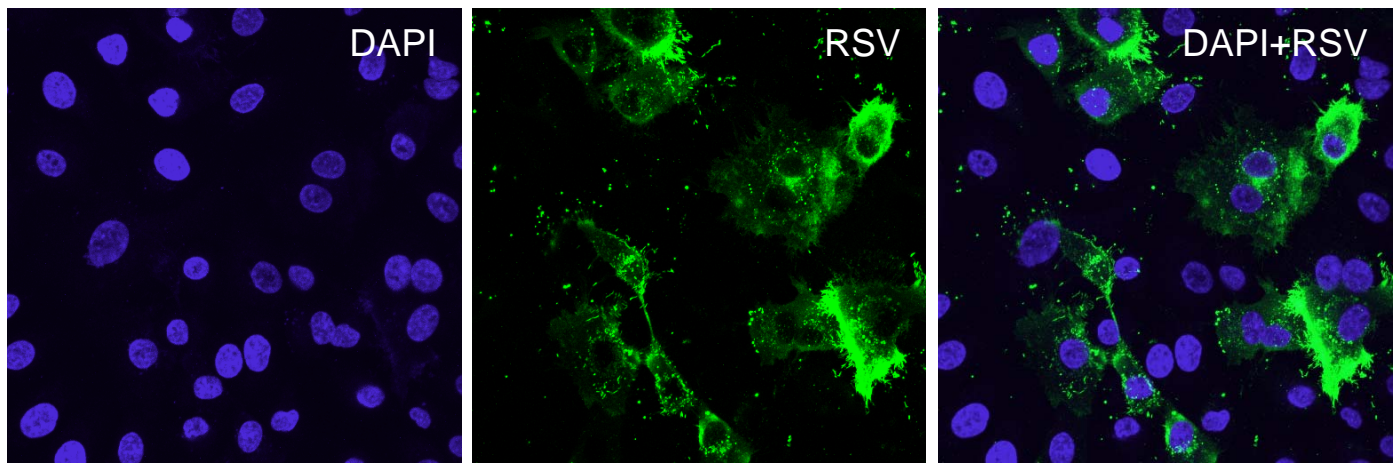

Supplementary Figure 2. Indirect immunofluorescence confocal microscopy analysis of RSV in cells used in the live cell assay for mitochondrial pore transition. RSV proteins are shown in green, and nuclei are stained blue with DAPI. A merged image is presented.
